# Supplementary material for: The effect of flywheel complex training with eccentric-overload on muscular adaptation in elite female volleyball players
Source: PeerJ. 2024 Mar 21;12:e17079. doi: 10.7717/peerj.17079 (PMC10961060; doi:10.7717/peerj.17079)
Supplement: Data S1 [file peerj-12-17079-s001.xlsx]

## Sheet: Sheet1
FCTEO-Pre-test-Hypertrophy-QF25	FCTEO-Pre-test-Hypertrophy-QF50	FCTEO-Pre-test-Hypertrophy-QF75	FCTEO-Post-test-Hypertrophy-QF25	FCTEO-Post-test-Hypertrophy-QF50	FCTEO-Post-test-Hypertrophy-QF75	TCT-Pre-test-Hypertrophy-QF25	TCT-Pre-test-Hypertrophy-QF50	TCT-Pre-test-Hypertrophy-QF75	TCT-Post-test-Hypertrophy-QF25	TCT-Post-test-Hypertrophy-QF50	TCT-Post-test-Hypertrophy-QF75		FCTEO-Pre-test-Maximal Semi-squat Strength	TCT-Pre-test-Maximal Semi-squat Strength	FCTEO-Post-test-Maximal Semi-squat Strength	TCT-Post-test-Maximal Semi-squat Strength		FCTEO-Pre-test-SJ Height	TCT-Pre-test-SJ Height	FCTEO-Post-test-SJ Height	TCT-Post-test-SJ Height	FCTEO-Pre-test-SJ Peak Power	TCT-Pre-test-SJ Peak Power	FCTEO-Post-test-SJ Peak Power	TCT-Post-test-SJ Peak Power		FCTEO-Pre-test-CMJ Height	TCT-Pre-test-CMJ Height	FCTEO-Post-test-CMJ Height	TCT-Post-test-CMJ Height	FCTEO-Pre-test-CMJ Peak Power	TCT-Pre-test-CMJ Peak Power	FCTEO-Post-test-CMJ Peak Power	TCT-Post-test-CMJ Peak Power		FCTEO-Pre-test-AJ Height	TCT-Pre-test-AJ Height	FCTEO-Post-test-AJ Height	TCT-Post-test-AJ Height	FCTEO-Pre-test-AJ Peak Power	TCT-Pre-test-AJ Peak Power	FCTEO-Post-test-AJ Peak Power	TCT-Post-test-AJ Peak Power
57.61	45.21	34.92	56.22	47.72	37.24	61.45	45.64	34.32	72.74	48.01	47.61		109.31	126.97	129.91	120.9		28.18	24.19	30.18	29.7	2572.14	2838.95	3120.89	3411.85		32.54	36.92	42.77	39.52	3111.1	2876.77	3734.54	3154.06		44.72	44.09	46.86	47.62	3291.5	3511.39	3635.45	3778.03
60.3	47.85	39.05	59.53	48.24	35.04	73.17	46.43	30.2	64.57	48.81	29.56		120.07	105.09	149.01	131.5		29.17	28.18	28.33	33.58	2977.12	2925.86	3051.94	3147.44		33.55	37	40.8	37.46	3139.3	3072.76	3545.27	3212.8		43.08	35.13	46.56	38.43	3871.69	3651.36	4356.12	3451.45
59.4	44.42	37.65	61.51	50.15	33.78	58.6	60.23	39.5	60.22	54.78	34.17		125.65	103.35	156.48	139.11		28.18	28.35	29.87	31.69	3058.83	2912.17	2866.39	3079.46		40.72	37.31	40.36	38.35	3151.32	3361.36	3463.35	3376.48		44.39	40.71	48.57	42.13	3784.17	3467.84	4034.95	3490.77
60.55	48.5	39.12	60.16	46.5	42.85	48.92	40.95	49.68	56.4	48.62	43.57		124.87	105.44	152.91	116.24		28.18	30	29.33	28.8	3051.68	3129.22	3179.78	3147.44		36.47	39.14	40.65	37.35	3234.2	3315.02	3530.12	3677.63		48.39	42.6	45.91	48.17	3945.36	3730.69	3800.29	3770.27
60.19	45.88	38.91	58.74	49.23	34.74	50.89	39.96	39.91	56.03	48.51	33.59		121.32	124.77	128.79	132.39		30.73	30.7	28.81	31.78	2661.21	2910.85	2864.68	2989.64		34.58	37.36	46.1	34.5	3491.23	3108.34	3717.89	3418.45		42.15	46.76	47.17	42.72	3431.2	3291.31	3999.31	3773.78
54.61	47.84	30.93	58.44	53.45	40.02	58.6	58.04	52.03	51.11	53.56	45.6		94.34	108.69	135.41	122.42		29.07	28.47	29.76	32.31	2298.72	3023.62	2919.8	3112.23		34.64	28.65	38.92	37.35	2546.87	3199.74	3793	3536.21		42.19	41.5	50.28	45.15	3418.75	3764.72	4297.09	3908.45
59.61	46.81	38.04	59.83	49.22	37.04	58.6	51.72	33.7	50.84	53.41	48.32		124.39	130.66	152.51	142.37		23.72	28.59	27.8	31.7	2464.99	2944.12	2472.88	3144.05		37.16	31.88	41.78	36.95	3228.11	3130.25	3630.7	2762.17		41.65	39.68	48.73	39.34	3776.22	3656.45	4121.41	3894.93
